# Supplementary material for: An ESIPT-active orange-emissive 2-(2′-hydroxyphenyl)imidazo[1,2-a]pyridine-derived chemodosimeter for turn-on detection of fluoride ions via desilylation
Source: Royal Society of Chemistry journal article supplement (doi:10.1039/d4ra05823b), 2024-01-01
Supplement: d4ra05823b1.pdf [file d4ra05823b1.pdf]

## Supporting Information

for

### An ESIPT-active Orange-emissive 2-(2'-Hydroxyphenyl)imidazo[1,2-a]pyridine-derived Chemodosimeter for Turn-on Detection of Fluoride Ions via Desilylation

Akhil A. Bhosle, Mainak Banerjee,\* Ankit Thakuri, Pooja D. Vishwakarma and Amrita Chatterjee\*

Department of Chemistry, Birla Institute of Technology and Science Pilani, KK Birla Goa Campus, Goa 403726, India.

\*E-mail: [mainak@goa.bits-pilani.ac.in](mailto:mainak@goa.bits-pilani.ac.in); [amrita@goa.bits-pilani.ac.in](mailto:amrita@goa.bits-pilani.ac.in).

#### Table of Contents

| Sr. No. | Contents                                                                                                   | Page No. |
|---------|------------------------------------------------------------------------------------------------------------|----------|
| 1.      | UV-Vis response of <b>HIP-Br</b> in different solvents (Figure S1)                                         | S2       |
| 2.      | Fluorescence response of <b>HIP-Br</b> in water-THF fractions (Figure S2)                                  | S2       |
| 3.      | Table S1: Comparative photophysical studies of <b>HIP-Br</b> and <b>HBT-Br</b> (Table S1)                  | S3       |
| 4.      | UV-Vis and fluorescence spectra of <b>HIPS-Br</b> and <b>HIP-Br</b> (Figure S3)                            | S3       |
| 5.      | Fluorescence response of <b>HIP-Br</b> and <b>HIPS-Br</b> at different pH ranges (Figure S4)               | S3-S4    |
| 6.      | Fluorescence response of <b>HIPS-Br</b> in water-THF fractions (Figure S5)                                 | S4       |
| 7.      | Time-dependent study for <b>HIP-Br</b> upon addition of F <sup>-</sup> ions (Figure S6)                    | S4       |
| 8.      | Fluorescence spectra <b>HIPS-Br</b> before and after the addition of F <sup>-</sup> (Figure S7)            | S5       |
| 9.      | UV-vis responses of <b>HIP-Br</b> in the presence and absence of F <sup>-</sup> ions (Figure S8)           | S5       |
| 10.     | Comparison of the present study with ESIPT-based and silyl cleavage-based detection of fluoride (Table S2) | S6-S9    |
| 11.     | References                                                                                                 | S10-S11  |
| 12.     | <sup>1</sup> H and <sup>13</sup> C NMR Spectra                                                             | S12-S13  |
| 13.     | Simulated input structure and coordinates                                                                  | S14-16   |

### 1. UV-Vis response of HIP-Br in different solvents

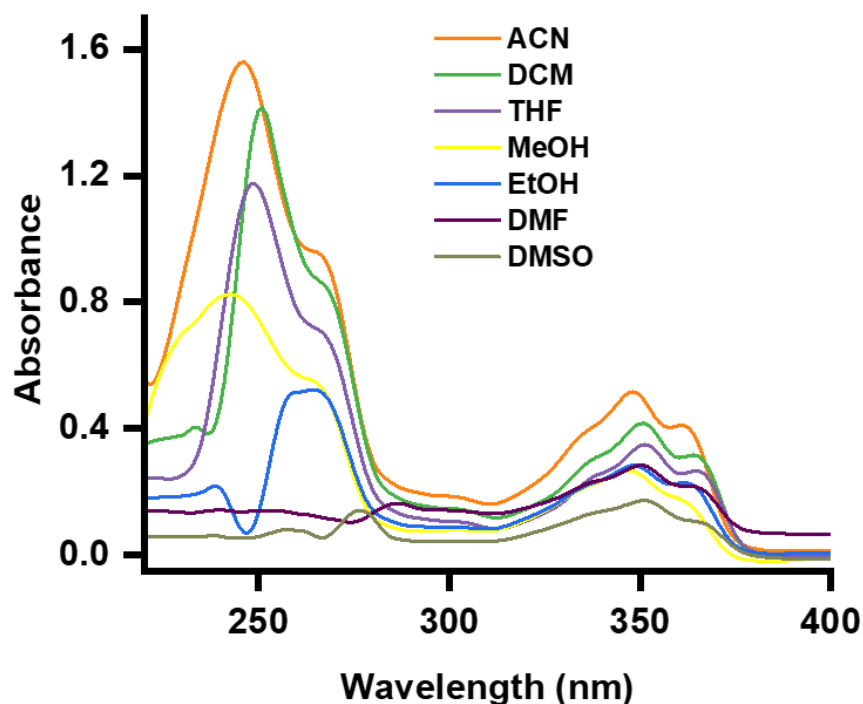

**Figure S1.** The UV-Vis responses of **HIP-Br** (30 μM) in different solvents showing the absorption band at around 340 nm along with a shoulder band at around 360 nm.

### 2. Fluorescence response of HIP-Br in water-THF fractions

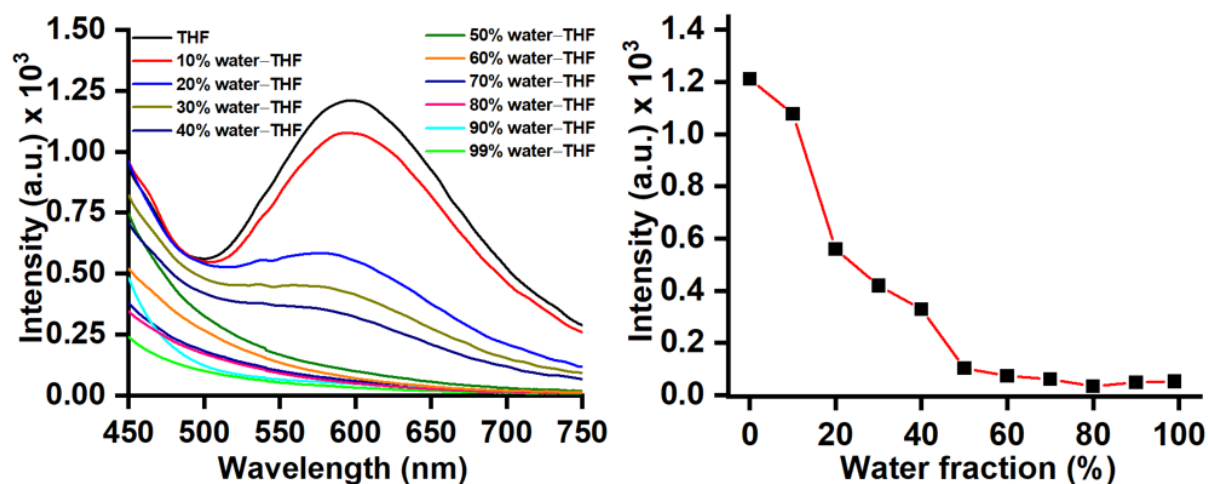

**Figure S2.** The fluorescence responses of **HIP-Br** (10 μM) at 598 nm as a function of different water-THF fractions ( $\%f_w$ ) showing a decrease in emission with the increase in water fractions.

### 3. Table S1: Comparative photophysical studies of HIP-Br and HBT-Br

| Solvent | $\lambda_{\text{abs1}}$ (nm) | $\lambda_{\text{abs2}}$ (nm) | $\lambda_{\text{em1}}$ (nm) | Int. | $\lambda_{\text{em2}}$ (nm) | Int. | Stokes shift (nm) | $\phi_1$ | $\phi_2$ |
|---------|------------------------------|------------------------------|-----------------------------|------|-----------------------------|------|-------------------|----------|----------|
| DCM     | 290                          | 348                          | -                           | -    | 523                         | 2585 | 175               | -        | 4.6      |
| THF     | 295                          | 345                          | -                           | -    | 535                         | 831  | 190               | -        | 1.25     |
| ACN     | 293                          | 345                          | -                           | -    | 538                         | 481  | 193               | -        | 0.6      |
| DMF     | 292                          | 342                          | 466                         | 5495 | -                           | -    | 124               | 10.7     | -        |
| DMSO    | 292                          | 342                          | 468                         | 5805 | -                           | -    | 126               | 11.02    | -        |
| EtOH    | -                            | 341                          | 429                         | 8758 | -                           | -    | 88                | 25.2     | -        |
| MeOH    | 291                          | 340                          | 427                         | 5100 | -                           | -    | 87                | 5.4      | -        |

#### 4. UV-Vis and fluorescence spectra of HIPS-Br and HIP-Br

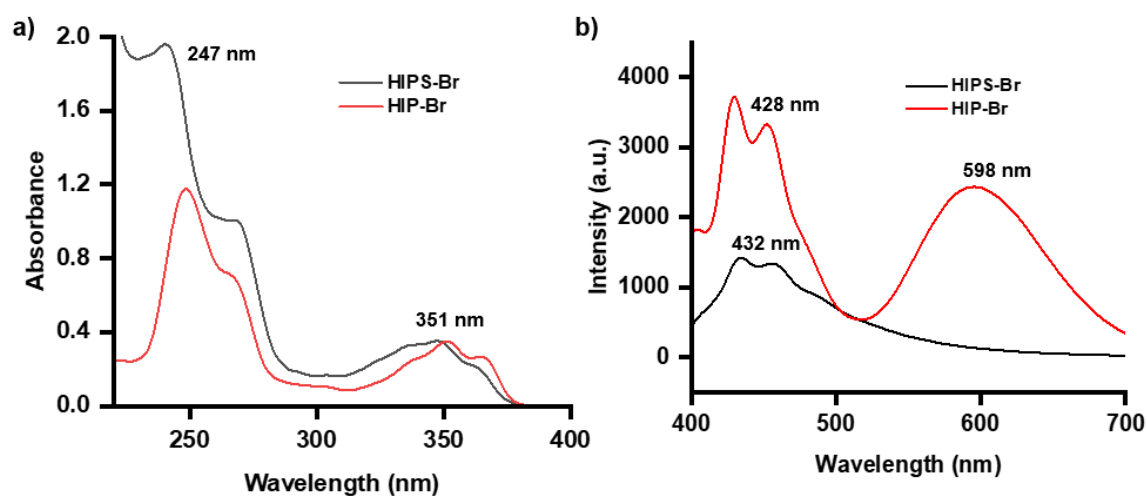

Figure S3. a) UV-Vis and b) fluorescence spectra of HIPS-Br and HIP-Br in THF.

#### 5. Fluorescence response of HIP-Br and HIPS-Br at different pH ranges

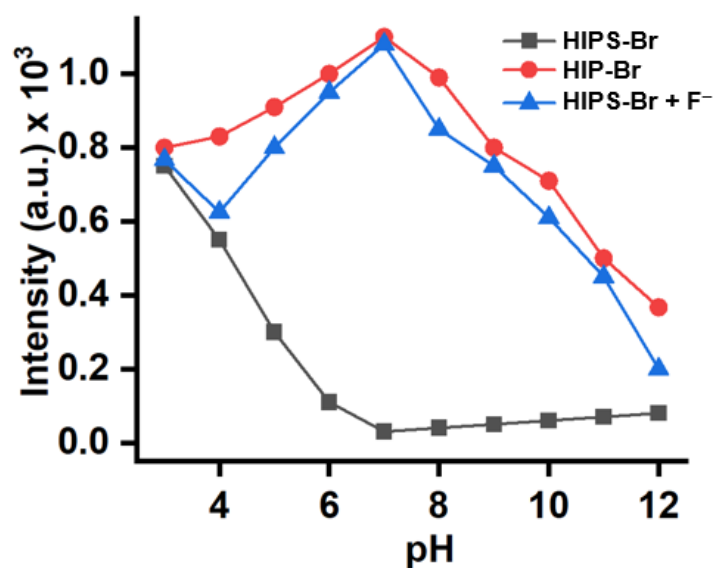

Figure S4. The fluorescence responses of HIPS-Br and HIP-Br in the presence and absence of F<sup>-</sup> ions at 598 nm as a function of pH.

## 6. Fluorescence response of HIPS-Br in water-THF fractions

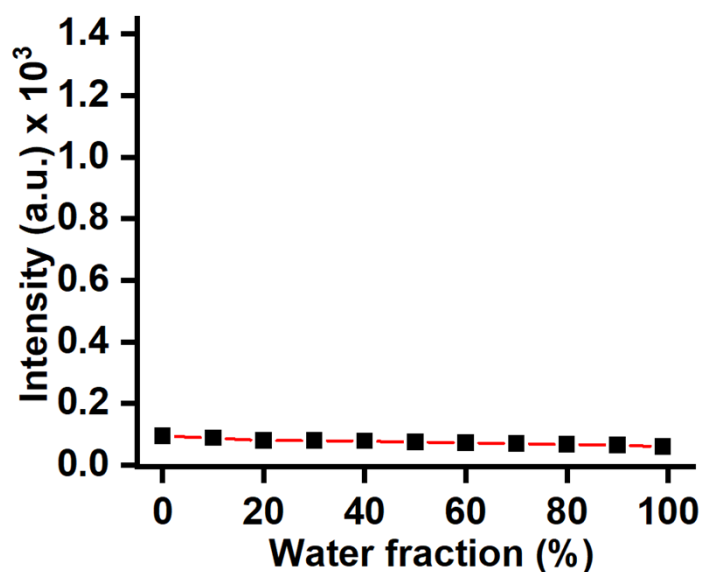

**Figure S5.** The fluorescence responses of **HIPS-Br** (10  $\mu\text{M}$ ) at 598 nm as a function of different water-THF fractions ( $\%f_w$ ) showing a turn-off response due to restriction in intramolecular proton transfer.

## 7. Time-dependent study for HIPS-Br upon addition of $\text{F}^-$

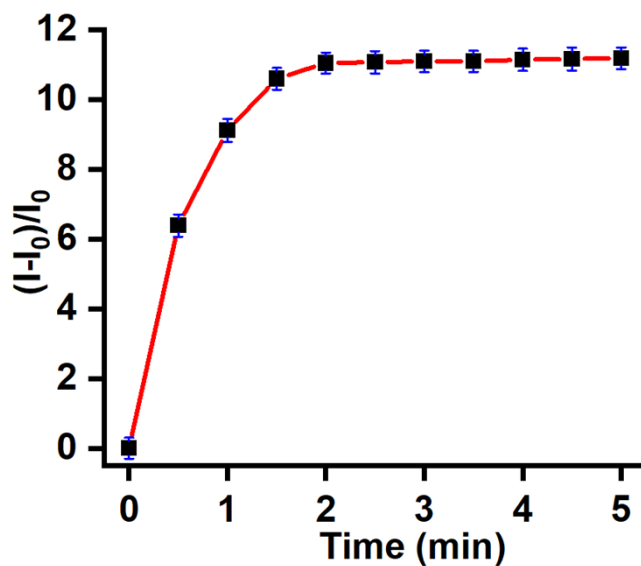

**Figure S6.** Time-dependent study and effect on the relative emission intensities of **HIPS-Br** (10  $\mu\text{M}$ ) upon addition of 60  $\mu\text{M}$  of  $\text{F}^-$  ions ( $\lambda_{\text{ex}}$  350 nm;  $\lambda_{\text{em}}$  598 nm).

## 8. Fluorescence spectra HIPS-Br before and after the addition of $\text{F}^-$

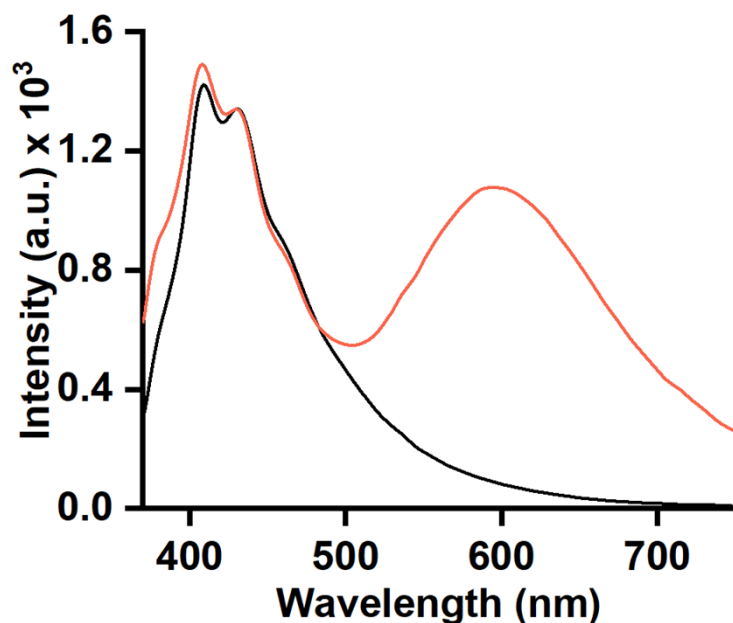

**Figure S7.** Fluorescence response of **HIPS-Br** (10  $\mu\text{M}$  in water-THF (1:9)) before (black) and after (red) the addition of  $\text{F}^-$  ions indicating no change in the emission at 410 nm ( $\lambda_{\text{ex}}$  350 nm;  $\lambda_{\text{em}}$  598 nm).

### 9. UV-Vis responses of HIPS-Br in the presence and absence of $\text{F}^-$ ions

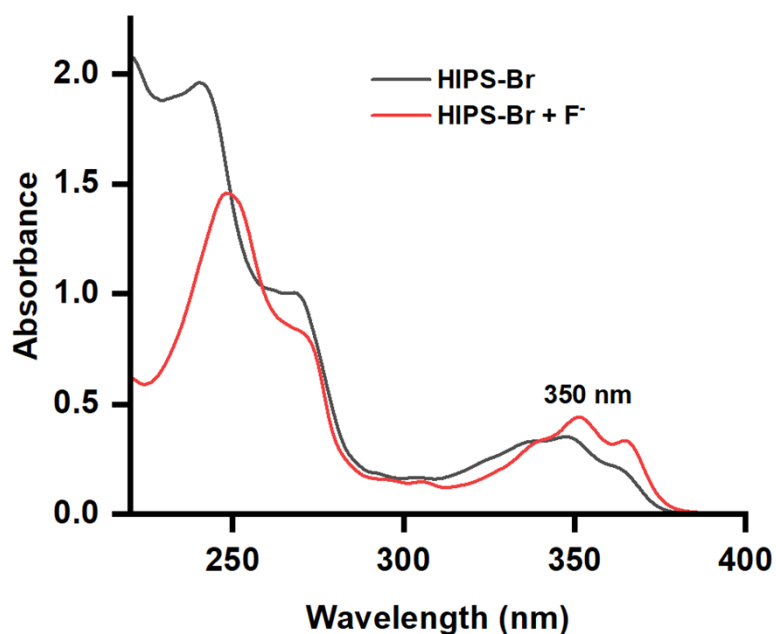

**Figure S8.** The UV-Vis responses of **HIPS-Br** (30  $\mu\text{M}$ ) in the presence and the absence of  $\text{F}^-$  ions (80  $\mu\text{M}$ ) showed no significant change in the absorption band at 350 nm.

### 10. Comparison of the present study with ESIPT-based and silyl cleavage-based detection of fluoride

| Sr. No. | Probe Structure                                                                                                                                                                                                                                                         | Response    | Linear range ( $\mu\text{M}$ ) | Detection limit (nm)  | Real sample analysis    | Solid- phase study | Ref. |
|---------|-------------------------------------------------------------------------------------------------------------------------------------------------------------------------------------------------------------------------------------------------------------------------|-------------|--------------------------------|-----------------------|-------------------------|--------------------|------|
|         | <i>ESIPT-based</i>                                                                                                                                                                                                                                                      |             |                                |                       |                         |                    |      |
| 1.      | 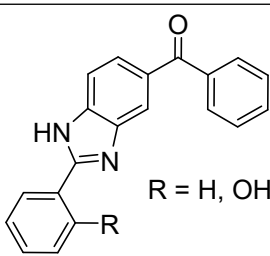 <p>R = H, OH</p> <p><math>\lambda_{\text{ex}} = 360 \text{ nm}</math>, <math>\lambda_{\text{em1}} = 420 \text{ nm}</math>,<br/><math>\lambda_{\text{em2}} = 540 \text{ nm}</math></p> | ratiometric | 2-2.4 x 10 <sup>3</sup>        | 2.0 x 10 <sup>3</sup> | -                       | TLC strips         | 1    |
| 2.      |  <p><math>\lambda_{\text{ex}} = 370 \text{ nm}</math>, <math>\lambda_{\text{em}} = 540 \text{ nm}</math></p>                                                                          | turn-on     | 0-50                           | 2.9 x 10 <sup>3</sup> | -                       | -                  | 2    |
| 3.      |                                                                                                                                                                                      | turn-on     | 0-50                           | 120                   | detection in HeLa cells | -                  | 3    |

|    |                                                                                                                                                                                                                                           |             |      |                 |   |              |   |
|----|-------------------------------------------------------------------------------------------------------------------------------------------------------------------------------------------------------------------------------------------|-------------|------|-----------------|---|--------------|---|
|    | $\lambda_{\text{ex}} = 360 \text{ nm}, \lambda_{\text{em}} = 430 \text{ nm}$                                                                                                                                                              |             |      |                 |   |              |   |
| 4. | 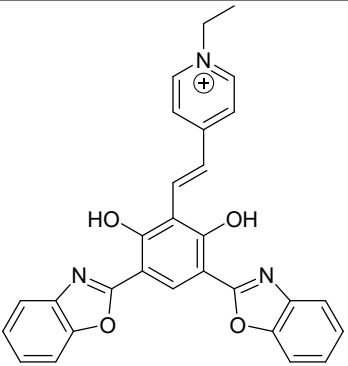 <p><math>\lambda_{\text{ex}} = 535 \text{ nm}, \lambda_{\text{em1}} = 720 \text{ nm},</math><br/><math>\lambda_{\text{em2}} = 450 \text{ nm}</math></p> | ratiometric | 1-10 | $1 \times 10^3$ | - | -            | 4 |
| 5. |  <p><math>\lambda_{\text{ex}} = 365 \text{ nm}, \lambda_{\text{em}} = 530 \text{ nm},</math></p>                                                         | turn-on     | -    | 11              | - | filter paper | 5 |
|    | <i>Silyl cleavage based</i>                                                                                                                                                                                                               |             |      |                 |   |              |   |
| 6. |                                                                                                                                                        | ratiometric | 0-2  | 430             | - | -            | 6 |

|    |                                                                                                                                                                                                                  |             |        |                    |                        |              |   |
|----|------------------------------------------------------------------------------------------------------------------------------------------------------------------------------------------------------------------|-------------|--------|--------------------|------------------------|--------------|---|
|    | $\lambda_{\text{ex}} = 322 \text{ nm}, \lambda_{\text{em1}} = 384 \text{ nm},$<br>$\lambda_{\text{em2}} = 475 \text{ nm}$                                                                                        |             |        |                    |                        |              |   |
| 7. | 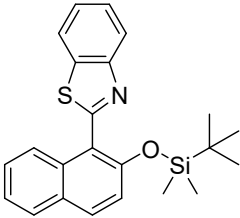<br>$\lambda_{\text{ex}} = 350 \text{ nm}, \lambda_{\text{em1}} = 407 \text{ nm},$<br>$\lambda_{\text{em2}} = 477 \text{ nm}$   | ratiometric | -      | $6.5 \times 10^3$  | analysis in HeLa cells | paper strips | 7 |
| 8. | <br>$\lambda_{\text{ex}} = 413 \text{ nm}, \lambda_{\text{em}} = 511 \text{ nm}$                                                | turn-on     | 0-70   | $1.16 \times 10^3$ | -                      | -            | 8 |
| 9. | <br>$\lambda_{\text{ex}} = 345 \text{ nm}, \lambda_{\text{em1}} = 406 \text{ nm},$<br>$\lambda_{\text{em2}} = 494 \text{ nm}$ | ratiometric | 25-200 | $25 \times 10^3$   | -                      | hydrogel     | 9 |



|     |                                                                                                                                                                                    |         |       |                    |                              |              |           |
|-----|------------------------------------------------------------------------------------------------------------------------------------------------------------------------------------|---------|-------|--------------------|------------------------------|--------------|-----------|
| 10. | 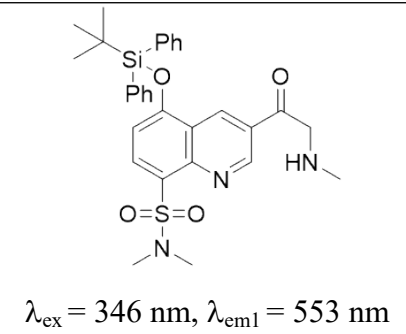 <p><math>\lambda_{\text{ex}} = 346 \text{ nm}, \lambda_{\text{em1}} = 553 \text{ nm}</math></p>  | turn-on | 0-200 | $50 \times 10^3$   | -                            | paper strips | 10        |
| 11. |  <p><math>\lambda_{\text{ex}} = 460 \text{ nm}, \lambda_{\text{em1}} = 523 \text{ nm}</math></p>  | turn-on | -     | $1.03 \times 10^3$ | detection in HeLa cells      | -            | 11        |
| 12. |  <p><math>\lambda_{\text{ex}} = 350 \text{ nm}, \lambda_{\text{em1}} = 598 \text{ nm}</math></p> | turn-on | 1-10  | 66                 | water samples and toothpaste | TLC strips   | This work |

## 11. References

1. A. S. Gupta, K. Paul and V. Luxami, Ratiometric fluorescent chemosensor for fluoride ion based on inhibition of excited state intramolecular proton transfer. *Spectrochim. Acta, Part A*, 2015, **138**, 67–72. <https://doi.org/10.1016/j.saa.2014.11.026>
2. G. Dhaka, N. Kaur and J. Singh, Exploiting the INHIBIT-ESIPT mechanism for the design of fluorescent chemosensor with a large blue-shift in emission. *J. Photochem. Photobiol., A*, 2017, **335**, 174–181. <https://doi.org/10.1016/j.jphotochem.2016.11.018>
3. K. Karuppiah, M. Nelson, M. M. Alam, M. Selvaraj, M. Sepperumal and S. Ayyanar, A new 5-bromoindolehydrazone anchored diiodosalicylaldehyde derivative as efficient fluoro and chromophore for selective and sensitive detection of tryptamine and F<sup>-</sup> ions: Applications in live cell imaging. *Spectrochim. Acta, Part A*, 2022, **269**, 120777. <https://doi.org/10.1016/j.saa.2021.120777>
4. C. S. Abeywickrama and Y. Pang, Synthesis of a bis[2-(2'-hydroxyphenyl)benzoxazole]pyridinium derivative: The fluoride-induced large spectral shift for ratiometric response. *New J. Chem.*, 2021, **45**, 9102–9108. <https://doi.org/10.1039/D1NJ00044F>
5. H. Dai, H. Zeng, H. Li, J. Long, K. W. Ng, Y. Wang, B. Xu, G. Shi, Z. Chi and C. Liu, Manipulation of excited-state intramolecular proton transfer by electron-donor substitution for high performance fluoride ions sensing. *Spectrochim. Acta, Part A*, 2024, 306, 123530. <https://doi.org/10.1016/j.saa.2023.123530>.
6. X. Li, B. Hu, J. Li, P. Lu and Y. Wang, Fluoride anion detection based on the excited state intramolecular proton transfer (ESIPT) of 2-(o-hydroxyphenyl)imidazole induced by the Si–O cleavage of its silyl ether. *Sens. Actuators, B*, 2014, **203**, 635–640. <https://doi.org/10.1016/j.snb.2014.07.014>
7. S. Goswami, A. K. Das, A. Manna, A. K. Maity, H. K. Func, C. K. Quah and P. Saha, A colorimetric and ratiometric fluorescent turn-on fluoride chemodosimeter and application in live cell imaging: High selectivity via specific Si–O cleavage in semi aqueous media and prompt recovery of ESIPT along with the X-ray structures. *Tetrahedron Lett.*, 2014, **55**, 2633–2638. <https://doi.org/10.1016/j.tetlet.2014.03.003>
8. X. Liu, X. Liu, Y. Shen and B. Gu, A simple water-soluble ESIPT fluorescent probe for fluoride ion with large stokes shift in living cells. *ACS Omega*, 2020, **5**, 21684–21688. <https://doi.org/10.1021/acsomega.0c02589>

9. L. Xiong, J. Feng, R. Hu, S. Wang, S. Li, Y. Li and G. Yang, Sensing in 15 s for aqueous fluoride anion by water-insoluble fluorescent probe incorporating hydrogel. *Anal. Chem.*, 2013, **85**, 4113–4119. <https://doi.org/10.1021/ac400252u>
10. X. Q. Zhou, R. Lai, H. Li and C. I. Stains, The 8-silyloxyquinoline scaffold as a versatile platform for the sensitive detection of aqueous fluoride. *Anal. Chem.*, 2015, **87**, 4081–4086. <https://doi.org/10.1021/acs.analchem.5b00430>
11. A. Roy, D. Kand, T. Saha and P. Talukdar, A cascade reaction based fluorescent probe for rapid and selective fluoride ion detection. *RSC Adv.*, 2014, **4**, 33890–33896 <https://doi.org/10.1039/C4CC01665C>

## 12. NMR Spectra:

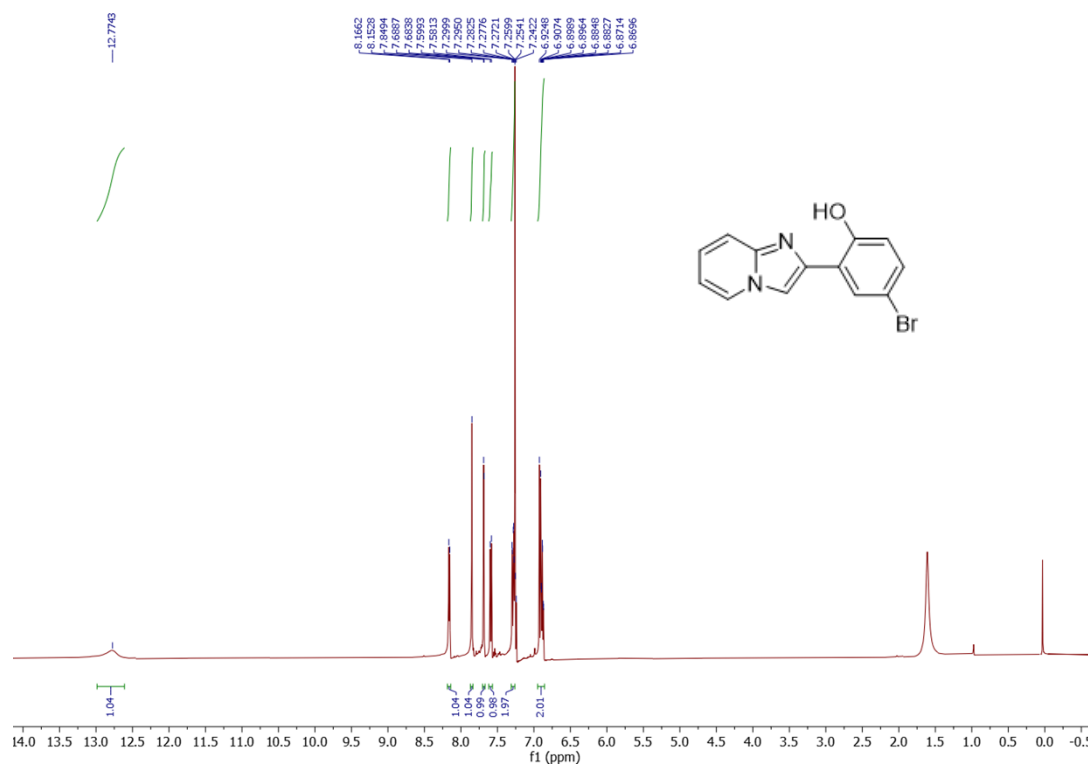

<sup>1</sup>H NMR spectrum of 4-bromo-2-(imidazo[1,2-*a*]pyridin-2-yl)phenol (**HIP-Br**) (CDCl<sub>3</sub>, 500 MHz).

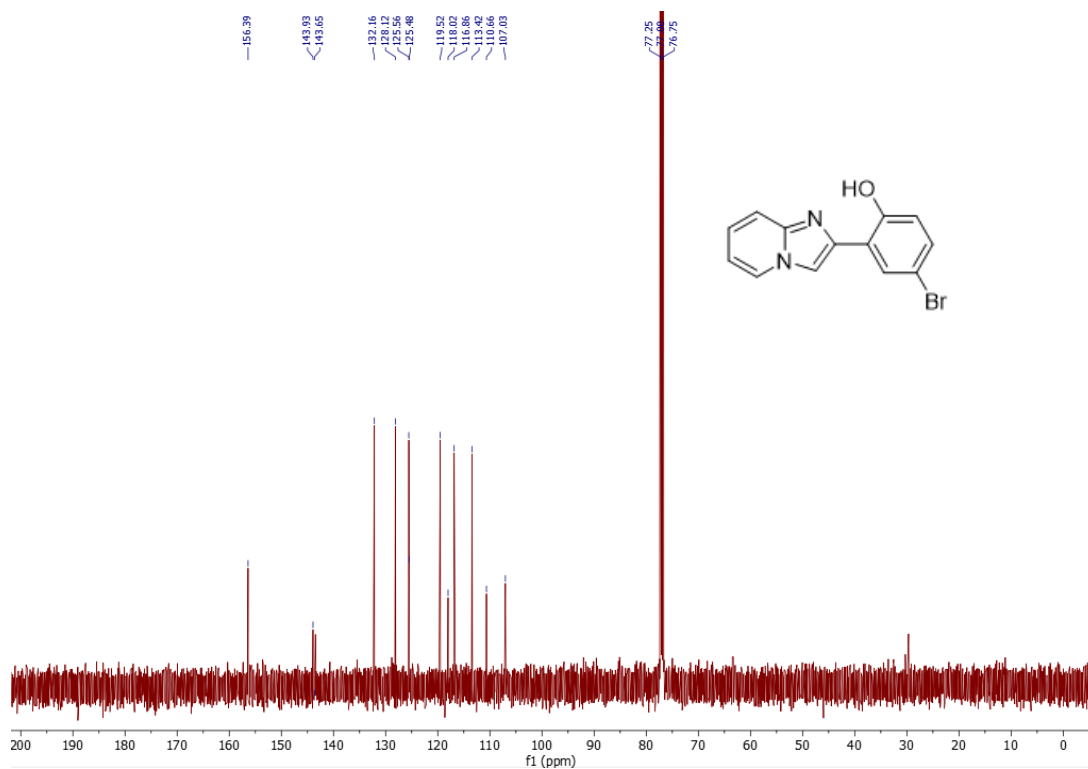

<sup>13</sup>C NMR spectrum of 4-bromo-2-(imidazo[1,2-*a*]pyridin-2-yl)phenol (**HIP-Br**) (CDCl<sub>3</sub>, 125 MHz).

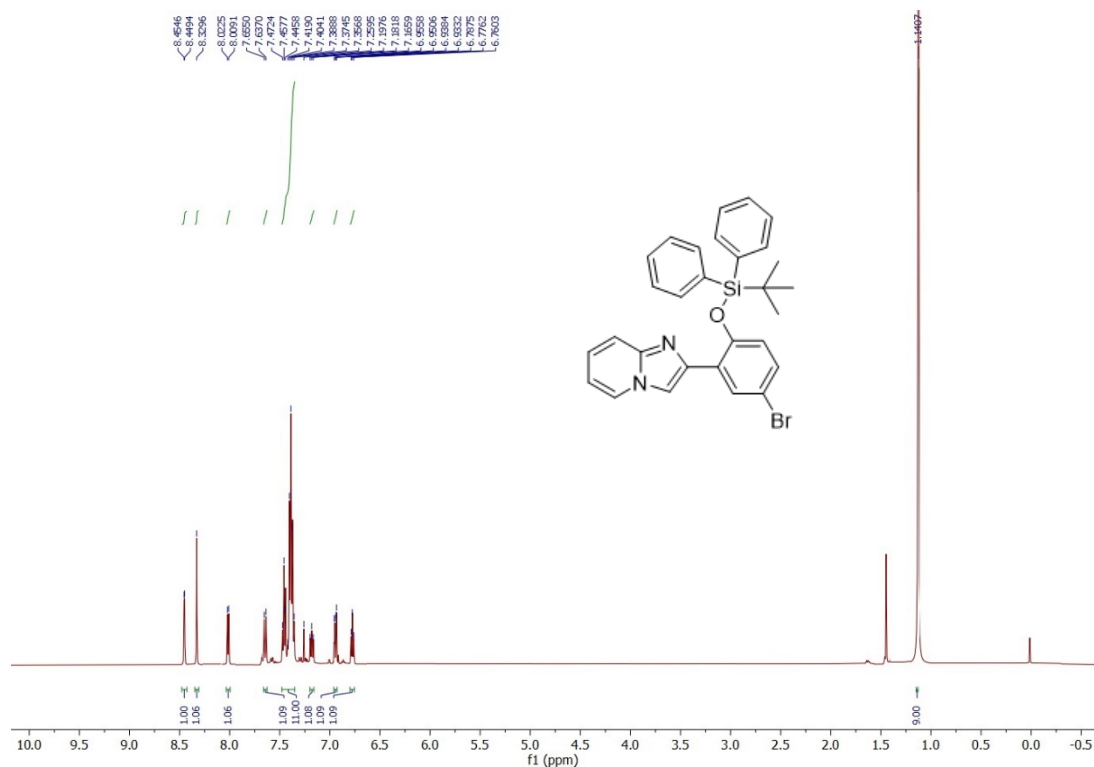

<sup>1</sup>H NMR spectrum of 2-(5-bromo-2-((tert-butyl)diphenylsilyloxy)phenyl)imidazo[1,2-a]pyridine (**HIPS-Br**) (CDCl<sub>3</sub>, 500 MHz).

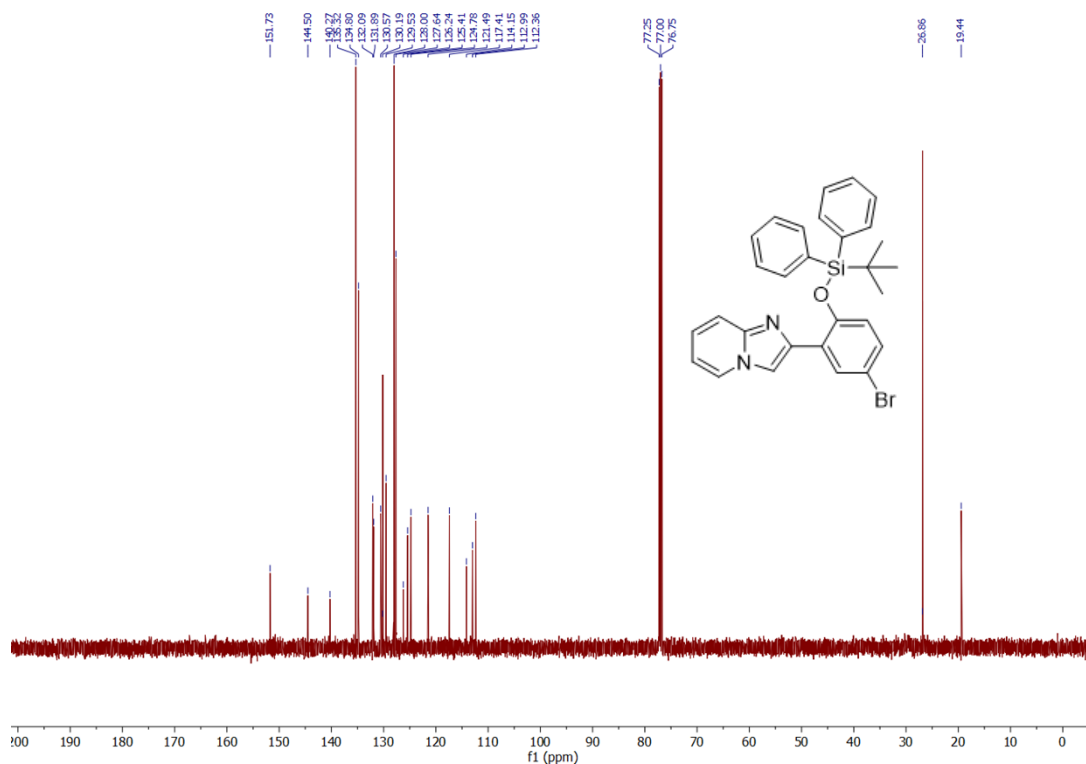

<sup>13</sup>C NMR spectrum of 2-(5-bromo-2-((tert-butyl)diphenylsilyloxy)phenyl)imidazo[1,2-a]pyridine (**HIPS-Br**) (CDCl<sub>3</sub>, 125 MHz).

### 13. Simulated input structure and coordinates

#### Input coordinates of HIPS-Br ( $\text{SiC}_{29}\text{N}_2\text{H}_{27}\text{OBr}$ )

|    |              |              |              |
|----|--------------|--------------|--------------|
| C  | -1.501157000 | 6.054280000  | 0.104559000  |
| C  | -0.113891000 | 5.803478000  | 0.151104000  |
| C  | 0.348008000  | 4.477931000  | 0.155631000  |
| N  | -0.568107000 | 3.477782000  | 0.114245000  |
| C  | -1.889546000 | 3.692461000  | 0.070019000  |
| C  | -2.410307000 | 4.983473000  | 0.063343000  |
| C  | -0.393506000 | 2.150080000  | 0.107939000  |
| C  | -1.660010000 | 1.560947000  | 0.056446000  |
| N  | -2.595414000 | 2.546875000  | 0.034767000  |
| C  | -2.024302000 | 0.107281000  | 0.027222000  |
| C  | -3.394024000 | -0.228154000 | 0.014895000  |
| C  | -3.805085000 | -1.559037000 | -0.010537000 |
| C  | -2.858856000 | -2.576956000 | -0.024160000 |
| C  | -1.498923000 | -2.271393000 | -0.015002000 |
| C  | -1.056856000 | -0.938649000 | 0.008468000  |
| O  | 0.259353000  | -0.608351000 | 0.014034000  |
| Br | -5.66997000  | -1.985304000 | -0.024305000 |
| Si | 1.884504000  | -1.184499000 | -0.053981000 |
| C  | 2.601864000  | -0.252366000 | -1.514282000 |
| C  | 2.637401000  | -0.536360000 | 1.535858000  |
| C  | 2.219056000  | -3.081978000 | -0.245005000 |
| C  | 1.727539000  | -3.830541000 | 1.013196000  |
| C  | 1.558458000  | -3.597417000 | -1.541781000 |
| C  | 3.725679000  | -3.391931000 | -0.373587000 |
| C  | 4.021081000  | -0.588288000 | 1.776301000  |
| C  | 4.549953000  | -0.093487000 | 2.972387000  |
| C  | 3.706093000  | 0.457817000  | 3.937844000  |
| C  | 2.330832000  | 0.517428000  | 3.708606000  |
| C  | 1.796918000  | 0.024642000  | 2.514565000  |
| C  | 3.982456000  | -0.240364000 | -1.776978000 |
| C  | 4.487989000  | 0.469582000  | -2.870300000 |
| C  | 3.623648000  | 1.173958000  | -3.709988000 |
| C  | 2.251127000  | 1.170914000  | -3.457414000 |
| C  | 1.740494000  | 0.463149000  | -2.365756000 |
| H  | -1.866112000 | 7.073077000  | 0.100559000  |
| H  | 0.588618000  | 6.626004000  | 0.182929000  |
| H  | 1.408116000  | 4.259582000  | 0.190693000  |
| H  | -3.477905000 | 5.157737000  | 0.027291000  |
| H  | 0.577388000  | 1.684401000  | 0.140273000  |
| H  | -4.149795000 | 0.546990000  | 0.026752000  |
| H  | -3.176772000 | -3.611698000 | -0.042344000 |
| H  | -0.819681000 | -3.082588000 | -0.024748000 |
| H  | 0.668273000  | -3.675367000 | 1.252525000  |
| H  | 2.292645000  | -3.485464000 | 1.906100000  |
| H  | 1.893020000  | -4.924434000 | 0.906554000  |
| H  | 0.476526000  | -3.420543000 | -1.598947000 |
| H  | 1.727145000  | -4.689686000 | -1.659275000 |
| H  | 1.999498000  | -3.085705000 | -2.424660000 |
| H  | 4.288364000  | -3.079707000 | 0.525192000  |

|   |             |              |              |
|---|-------------|--------------|--------------|
| H | 4.164786000 | -2.920115000 | -1.273061000 |
| H | 3.888056000 | -4.486801000 | -0.482130000 |
| H | 4.698232000 | -0.999158000 | 1.049790000  |
| H | 5.616935000 | -0.136349000 | 3.149633000  |
| H | 4.118182000 | 0.840190000  | 4.862817000  |
| H | 1.676539000 | 0.945765000  | 4.456927000  |
| H | 0.727777000 | 0.080521000  | 2.361328000  |
| H | 4.674458000 | -0.766620000 | -1.143181000 |
| H | 5.552768000 | 0.474932000  | -3.065032000 |
| H | 4.017659000 | 1.723071000  | -4.555342000 |
| H | 1.580906000 | 1.717554000  | -4.108161000 |
| H | 0.673229000 | 0.474229000  | -2.192959000 |

**Input coordinates of HIP-Br (C<sub>13</sub>N<sub>2</sub>H<sub>9</sub>OBr)**

|    |              |              |              |
|----|--------------|--------------|--------------|
| N  | -0.202689000 | 0.709307000  | 0.008319000  |
| C  | -0.291626000 | -0.682871000 | -0.004828000 |
| C  | 0.880783000  | -1.452867000 | 0.020595000  |
| C  | 2.126258000  | -0.758892000 | 0.059298000  |
| C  | 2.184433000  | 0.635865000  | 0.071643000  |
| C  | 0.999464000  | 1.401364000  | 0.045847000  |
| C  | -1.509932000 | 1.210269000  | -0.022797000 |
| C  | -2.378570000 | 0.073828000  | -0.054836000 |
| N  | -1.620454000 | -1.068031000 | -0.043374000 |
| C  | -3.816899000 | 0.030437000  | -0.093670000 |
| C  | -4.472116000 | -1.232336000 | -0.120973000 |
| C  | -5.850439000 | -1.302696000 | -0.158409000 |
| C  | -6.657556000 | -0.160325000 | -0.171178000 |
| C  | -6.028841000 | 1.093675000  | -0.144653000 |
| C  | -4.639944000 | 1.189270000  | -0.106738000 |
| O  | -4.001950000 | 2.434548000  | -0.080032000 |
| Br | -6.710358000 | -3.053175000 | -0.194960000 |
| H  | 0.812009000  | -2.530103000 | 0.010423000  |
| H  | 3.045929000  | -1.333423000 | 0.079469000  |
| H  | 3.136699000  | 1.150227000  | 0.101108000  |
| H  | 0.952538000  | 2.479743000  | 0.052933000  |
| H  | -1.734597000 | 2.260738000  | -0.020685000 |
| H  | -3.860919000 | -2.124396000 | -0.111511000 |
| H  | -7.736066000 | -0.240932000 | -0.200668000 |
| H  | -6.631713000 | 1.998238000  | -0.153795000 |
| H  | -4.649841000 | 3.164139000  | -0.091728000 |

**Input coordinates of HIP-Br<sub>1PT</sub> (C<sub>13</sub>N<sub>2</sub>H<sub>9</sub>OBr)**

|   |             |              |              |
|---|-------------|--------------|--------------|
| C | 5.557682000 | -0.432946000 | 0.215505000  |
| C | 5.095813000 | -1.714656000 | -0.133084000 |
| C | 3.724490000 | -1.921513000 | -0.325686000 |
| N | 2.882967000 | -0.868671000 | -0.167439000 |
| C | 3.285540000 | 0.365192000  | 0.164866000  |
| C | 4.651265000 | 0.628600000  | 0.369557000  |
| C | 1.551884000 | -0.828606000 | -0.294136000 |
| C | 1.119670000 | 0.478798000  | -0.034539000 |

|    |              |              |              |
|----|--------------|--------------|--------------|
| N  | 2.239484000  | 1.230779000  | 0.256459000  |
| C  | -0.360115000 | 0.865953000  | -0.050812000 |
| C  | -1.313389000 | -0.186939000 | 0.011700000  |
| C  | -2.687067000 | 0.063736000  | 0.009015000  |
| C  | -3.158469000 | 1.366982000  | -0.058789000 |
| C  | -2.260067000 | 2.423431000  | -0.128215000 |
| C  | -0.877805000 | 2.195397000  | -0.127488000 |
| O  | -0.088982000 | 3.264554000  | -0.233924000 |
| Br | -3.923319000 | -1.390322000 | 0.102945000  |
| H  | 6.616322000  | -0.264146000 | 0.365123000  |
| H  | 5.793502000  | -2.533294000 | -0.251522000 |
| H  | 3.345856000  | -2.900192000 | -0.593805000 |
| H  | 5.025678000  | 1.604779000  | 0.633972000  |
| H  | 0.960322000  | -1.692554000 | -0.559700000 |
| H  | -1.007030000 | -1.217282000 | 0.080738000  |
| H  | -4.223161000 | 1.562603000  | -0.061838000 |
| H  | -2.638609000 | 3.436421000  | -0.190629000 |
| H  | 2.321383000  | 2.193171000  | 0.515484000  |
